# Supplementary material
Source: PubMed Central journal article supplement (PMC11028549)
Supplement: 262_2014_1555_MOESM1_ESM.pdf [file 262_2014_1555_MOESM1_ESM.pdf]

## Supplementary

**Supplementary table 1:** Forward and reverse primers used for real time PCR.

|                | <b>Forward primer</b>             | <b>Reverse primer</b>           |
|----------------|-----------------------------------|---------------------------------|
| $\beta$ -actin | 5'-CTGACAGGATGCAGAAGGAGATTACT-3'  | 5'-GCCACCGATCCACACAGAGT-3'      |
| MAdCAM-1       | 5'-AACTGGTGCTGACCCATAGAAAGGA-3'   | 5'-GGGCT CAGCAGAGGTCGTGTT-3'    |
| VCAM-1         | 5'-TGGGAAGCTGGAACGAAGTA-3'        | 5'-TGTCTGGAGCCAAACACTTG-3'      |
| CCR9           | 5'-CACTCACCTCCGCCGTACATCT-3'      | 5'-ATGCCAGGAATAAGGCTTGTGAGTT-3' |
| CCL17          | 5'-TGCTTCTGGGGACTTTTCTG-3'        | 5'-CATCCCTGGAACACTCCACT-3'      |
| CCL20          | 5'-TGGGTGAAAAGGGCTGTGA-3'         | 5'-CCAATTCATCCCAAAAAAGC-3'      |
| CCL22          | 5'-TATGGTGCCAATGTGGAAGA-3'        | 5'-TCGGTTCTTGACGGTTATCA-3'      |
| CCL25          | 5'-GCTAGGAATTATCACCAGCAGGAAGT-3'  | 5'-ATGTCCTCTGGATTCCACACA-3'     |
| CXCL9          | 5'-CGATCCACTACAAATCCCTCA-3'       | 5'-AGTCCGGATCTAGGCAGGT-3'       |
| CXCL-10        | 5'-ATATCGATGACGGGCCAGTGA-3'       | 5'-TTTCATCGTGGCAATGATCTCA-3'    |
| CXCL-11        | 5'-AGCTGCTCAAGGCTTCCTTATGT-3'     | 5'-TCTGCCATTTTGACGGCTTT-3'      |
| FoxP3          | 5'-GGCCCTTCTCCAGGACAGA-3'         | 5'-GCTGATCATGGCTGGGTTG-3'       |
| IL-10          | 5'-CATTGAATCCCTGGGTGAGA-3'        | 5'-TGCTCCACTGCCTTGCTCTT-3'      |
| IL-17          | 5'-CCGAATGAAGACCTGATAGA-3'        | 5'-TCATGTGGTGGTCCAGCTTTC-3'     |
| IFN- $\gamma$  | 5'-TTTAACTCAAGTGGCATAGATGTGGAA-3' | 5'-ATCTGGCTCTGCAGGATTTTCA-3'    |

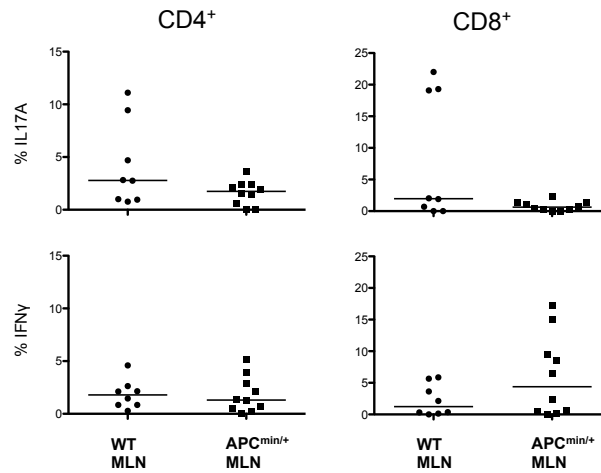

**Supplementary figure 1:** Cytokine producing cells in WT and APC<sup>Min/+</sup> MLN. Lymphocytes were prepared from MLN from both WT and APC<sup>Min/+</sup> mice and stimulated with PMA/ionomycin. The frequencies of IL-17A<sup>+</sup> and IFN-γ<sup>+</sup> cells among CD4<sup>+</sup> or CD8<sup>+</sup> T cells were determined by flow cytometry. Symbol represents individual mice and bar represent median

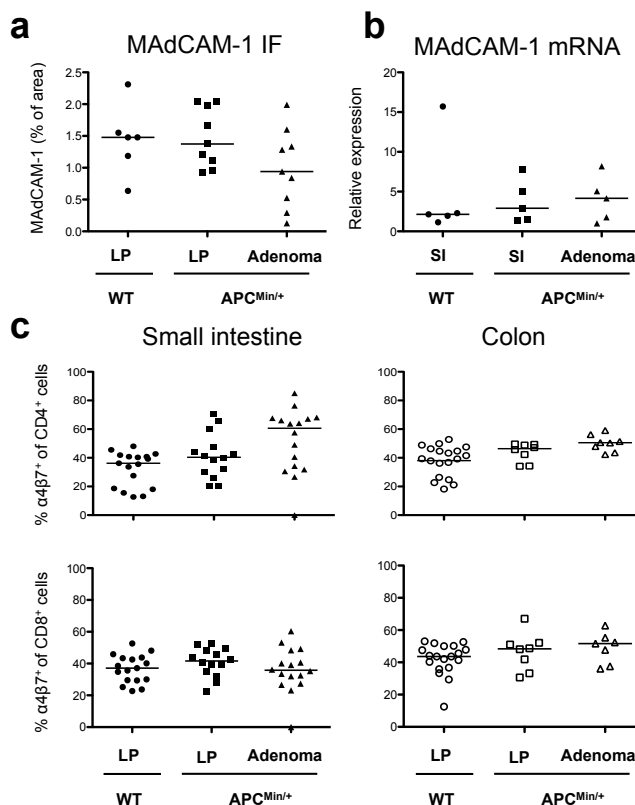

**Supplementary figure 2:** MAdCAM-1 and integrin  $\alpha 4\beta 7$  expression in small intestinal lamina propria (LP) and adenoma. MAdCAM-1 expression was determined in small intestinal LP from APC<sup>Min/+</sup> and WT mice, and in adenomas from APC<sup>Min/+</sup> mice by immunofluorescence (IF) (a) and real time PCR (b). (a) Shows percentage of the tissue area expressing MAdCAM-1, and (b) the mRNA expression normalized against  $\beta$ -actin. The frequencies of  $\alpha 4\beta 7$ <sup>+</sup> cells (c) among CD4<sup>+</sup> and CD8<sup>+</sup> T cells were analysed by flow cytometry in small intestinal and colon LP and adenoma from 18 weeks old WT and APC<sup>Min/+</sup> mice. Symbols represent individual mice and lines represent median.

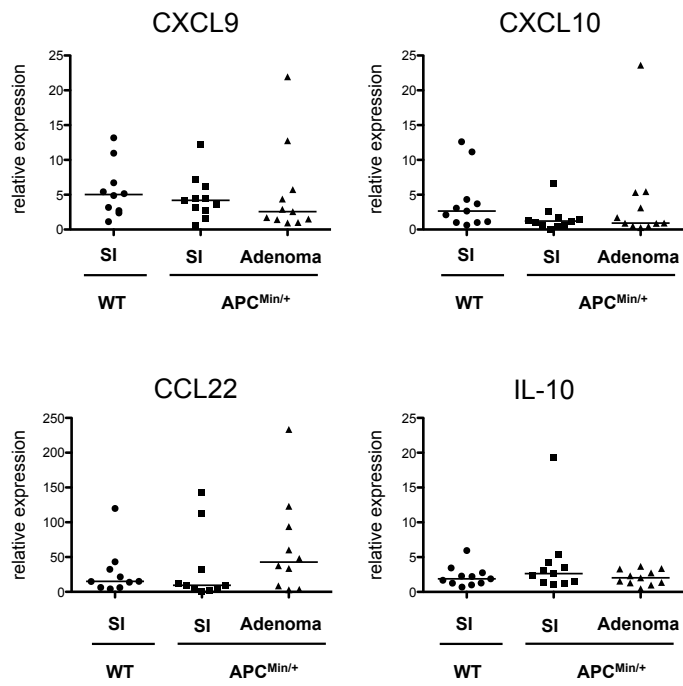

**Supplementary figure 3:** Chemokine mRNA expression in small intestine (SI) and adenomas. The expression of mRNA was examined in WT SI and APC<sup>Min/+</sup> unaffected SI and adenoma tissue from 18 week old mice by real time PCR and normalized against  $\beta$ -actin. Symbols represent individual mice and lines represent median.
